# Supplementary material for: Renal Prognosis in Children With Tubulointerstitial Nephritis and Uveitis Syndrome
Source: PubMed Central journal article supplement — Kidney Int Rep. 2021 Oct 7;6(12):3045–53. doi: 10.1016/j.ekir.2021.09.017 (PMC8640547; doi:10.1016/j.ekir.2021.09.017), 2021-10-07
Supplement: mmc1.pdf [file mmc1.pdf]

## Supplemental material

The diagnosis of TINU syndrome requires the presence of both tubulo-interstitial nephritis (TIN) and uveitis, without other known systemic diseases that can cause either TIN or uveitis.

### **Diagnostic criteria for TIN was defined by:**

- Histopathologic diagnosis: kidney biopsy consistent with tubulointerstitial nephritis  
or

- Clinical diagnosis:

1. Abnormal kidney function (elevated serum creatinine or decreased creatinine clearance)
2. Abnormal urinalysis: increased beta-2 microglobulin, low-grade proteinuria (level below that seen in patients with nephrotic syndrome), urinary eosinophils, pyuria or hematuria without infection, urinary white cell casts, or normoglycemic glucosuria
3. A systemic illness lasting more than 2 weeks, characterized by a combination of:
  - a. Signs and symptoms: fever, weight loss, anorexia, malaise, fatigue, rash, abdominal or flank pain, arthralgias, or myalgias
  - b. Laboratory findings: evidence of anemia, abnormal liver function, eosinophilia, or Westergren erythrocyte sedimentation rate >40 mm/hr

The clinical diagnosis was considered with “complete criteria” if the 3 factors listed above are present, and “incomplete criteria” if less than 3 factors listed above are present.

### **Uveitis characteristics**

- Typical

Bilateral anterior uveitis with or without intermediate uveitis or posterior uveitis

Onset of uveitis >2 months before or >12 months after TIN

- Atypical

Unilateral anterior uveitis or intermediate uveitis or posterior uveitis or a combination of these categories

Onset of uveitis >2 months before or >12 months after TIN

TINU syndrome are categorized as “definite,” “probable,” or “possible” on the basis of the diagnostic criteria for TIN and the uveitis characteristics, as defined above.

“Definite” TINU syndrome:

- TIN diagnosed histopathologically or clinically with complete criteria AND Typical uveitis

“Probable” TINU syndrome:

- TIN diagnosed histopathologically AND Atypical uveitis

or

- TIN diagnosed clinically with incomplete criteria AND Typical uveitis

“Possible” TINU syndrome:

- TIN diagnosed clinically with incomplete criteria AND Atypical uveitis

**Supplementary Table S1:** Diagnostic criteria for TINU syndrome, adapted from Table 5 of Mandeville’s article.

| Patients | Sex | Age. y | Time between attacks*. m | TIN relapses (n) | Uveitis relapses (n) | CS | 2 <sup>nd</sup> line treatment | eGFR at diagnosis | eGFR at 1 year | eGFR at last follow up | Duration of follow-up. y |
|----------|-----|--------|--------------------------|------------------|----------------------|----|--------------------------------|-------------------|----------------|------------------------|--------------------------|
| 1        | F   | 9.9    | 0                        | 0                | 2                    | IV | No                             | 36.7              | 77.3           | 107                    | 3.8                      |
| 2        | F   | 15.0   | 0                        | 0                | 3                    | IV | No                             | 22.1              | 65.1           | 91.2                   | 5.2                      |
| 3        | M   | 8.9    | -1                       | 0                | 2                    | IV | No                             | 52.8              | 88.6           | 101                    | 1.6                      |
| 4        | M   | 15.1   | 0                        | 0                | 2                    | IV | No                             | 30.4              | 70.6           |                        | 1.0                      |
| 5        | M   | 8.6    | 0                        | 0                | 0                    | PO | No                             | 54.5              | 87.1           | 60.3                   | 2.7                      |
| 6        | F   | 7.2    | -0.4                     | 0                | 2                    | IV | No                             | 52.1              | 108.7          | 113.5                  | 2.3                      |
| 7        | M   | 13.8   | 4                        | 0                | 0                    | PV | No                             | 36.7              | 96.1           | 108.9                  | 5.0                      |
| 8        | F   | 11.0   | 3.4                      | 0                | 0                    | IV | No                             | 21.8              | 74.7           | 82.3                   | 1.3                      |
| 9        | F   | 14.6   | 2.1                      | 1                | 3                    | IV | Yes                            | 14.8              | 88.7           | 95.5                   | 2.4                      |
| 10       | M   | 10.9   | 2.7                      | 0                | 1                    | PO | No                             | 11.3              | 76.5           | 80.5                   | 5.5                      |
| 11       | M   | 9.6    | 4.1                      | 0                | 0                    | PO | Yes                            | 30.7              | 97.1           |                        | 2.7                      |
| 12       | F   | 11.0   | 12.2                     | 0                | 2                    | IV | No                             | 14                | 65.5           | 71.3                   | 3.9                      |
| 13       | M   | 10.5   | -4                       | 0                | 1                    | PO | No                             | 48.9              | 95.7           | 101.7                  | 4.1                      |
| 14       | F   | 14.6   | -0.2                     | 0                | 1                    | PO | No                             | 26.9              | 84.4           | 106.3                  | 2.8                      |
| 15       | F   | 13.5   | 2.3                      | 0                | >5                   | IV | Yes                            | 4.9               | 76.2           | 81.7                   | 2.5                      |
| 16       | M   | 15.1   | 0.2                      | 0                | 2                    | PO | No                             | 41.1              | 90.7           | 83.3                   | 2.8                      |
| 17       | F   | 15.9   | 2.8                      | 0                | 0                    | PO | No                             | 42.9              | 94.2           | 94.2                   | 2.1                      |
| 18       | M   | 11.2   | -3.2                     | 0                | >2                   | PO | No                             | 18.9              | 89.5           | >90                    | 9.5                      |
| 19       | F   | 13.0   | 5.8                      | 0                | 0                    | PO | No                             | 27.5              | 77.8           | 74.4                   | 4.3                      |
| 20       | M   | 12.4   | 0.5                      | 0                | 0                    | PO | No                             | 36.3              | 80.8           | 87.5                   | 8.2                      |
| 21       | M   | 10.1   | 0                        | 0                | 1                    | PO | No                             | 55.3              | 113.9          | 116.6                  | 2.6                      |
| 22       | M   | 14.3   | -2.9                     | 0                | 0                    | .  | No                             | 62.1              | 62             |                        | 1.0                      |
| 23       | F   | 14.9   | -1.2                     | 0                | 0                    | PO | No                             | 12.8              | 72.5           | 71.6                   | 2.1                      |
| 24       | M   | 11.3   | 7.8                      | 0                | 0                    | PO | No                             | 28.9              | 94.5           | 100.3                  | 3.2                      |
| 25       | F   | 8.8    | 2.3                      | 1                | 2                    | IV | Yes                            | 23                | 87.4           | 108.7                  | 1.2                      |
| 26       | M   | 14.5   | 6.4                      | 0                | 1                    | IV | Yes                            | 39.4              | 75.1           | 70                     | 1.5                      |
| 27       | F   | 15.6   | 3.1                      | 0                | 0                    | IV | No                             | 16.7              | 71.9           | 72.1                   | 1.1                      |
| 28       | M   | 14.0   | 4.7                      | 1                | 2                    | PO | Yes                            | 36.8              | 61.1           | 72.4                   | 3.3                      |
| 29       | F   | 14.7   | 0.1                      | 0                | 0                    | PO | No                             | 24.7              | 85.6           | 86                     | 3.9                      |
| 30       | M   | 15.3   | 0                        | 0                | 0                    | PO | No                             | 45                | 65.7           | 70.4                   | 6.3                      |
| 31       | F   | 14.1   | 15.5                     | 0                | 0                    | PO | No                             | 45                | 83.4           | 84                     | 2.6                      |
| 32       | F   | 14.5   | 0                        | 0                | 0                    | PO | No                             | 7.8               | 91.3           | 80.8                   | 3.6                      |
| 33       | F   | 15.1   | -1.6                     | 0                | 1                    | PO | No                             | 60.7              | 69.4           | 66.5                   | 1.2                      |
| 34       | M   | 10.0   | -0.6                     | 0                | 5                    | PO | Yes                            | 62.8              | 114.3          | 116.1                  | 2.0                      |
| 35       | M   | 14.2   | 5.8                      | 2                | 0                    | IV | No                             | 26.3              | 72.2           | 73.4                   | 1.2                      |
| 36       | F   | 14.3   | 0                        | 0                | 0                    | PO | No                             | 20                | 82.1           | 90.1                   | 2.2                      |
| 37       | F   | 17.0   | 0                        | 0                | 4                    | IV | No                             | 50.1              | 99.2           |                        | 1.5                      |
| 38       | F   | 13.4   | 1.7                      | 0                | 0                    | IV | No                             | 18.4              | 77.9           | 79.1                   | 5.1                      |
| 39       | F   | 10.5   | 8.6                      | 0                | 3                    | IV | Yes                            | 20.1              | 129.6          | 152.8                  | 2.9                      |
| 40       | M   | 13.8   | 5.3                      | 0                | 2                    | PO | Yes                            | 19.6              | 105.7          | 107.1                  | 4.2                      |
| 41       | F   | 14.9   | 5                        | 0                | 0                    | IV | No                             | 20.8              | 80.5           |                        | 1.0                      |
| 42       | M   | 13.2   | 0                        | 0                | 5                    | .  | No                             | 53.9              | 60.2           | 95.3                   | 3.0                      |
| 43       | F   | 14.8   | 0                        | 0                | >3                   | IV | Yes                            | 54.6              | 102.1          | 101.3                  | 2.8                      |
| 44       | M   | 13.0   | 17                       | 1                | 1                    | IV | Yes                            | 39.5              | 90             | 63.7                   | 5.7                      |
| 45       | M   | 15.1   | 3                        | 0                | 0                    | PO | No                             | 10.4              | 71             |                        | 1.0                      |
| 46       | F   | 13.5   | 0                        | 0                | >5                   | IV | Yes                            | 44.2              | 78             | 90.5                   | 9.6                      |

eGFR = estimated glomerular filtration rate (mL/min/1.73m<sup>2</sup>), F = female, M = male, TIN = tubulointerstitial nephritis, CS = corticosteroids, IV = intravenous, PO = per os.

m = months, y = years.

\*Positive if ophthalmic symptoms initially and negative if renal symptoms initially.

### Supplementary Table S2: Patient characteristics, progression and treatments.

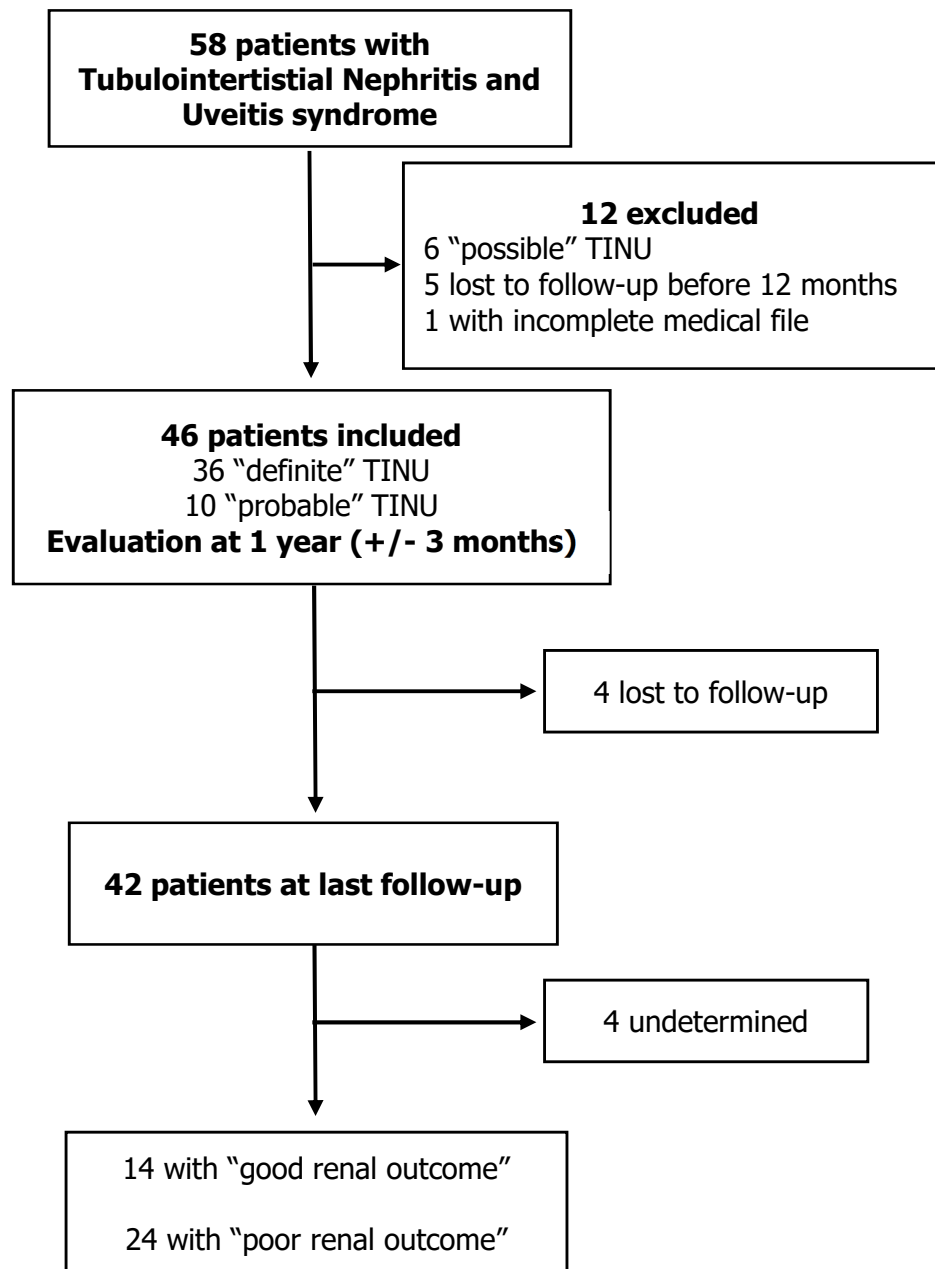

**Supplementary Figure S1: Flow chart**
